# Supplementary material for: A one-dimensional homochiral Mo(iv)-Cu(ii) coordination polymer: spontaneous resolution and photoresponsive properties
Source: Royal Society of Chemistry journal article supplement (doi:10.1039/c0ce00178c), 2010-01-01
Supplement: c0ce00178c.pdf [file c0ce00178c.pdf]

**A one-dimensional homochiral Mo(IV)-Cu(II) coordination polymer: spontaneous resolution and photoresponsive properties**

Wen Zhang, Hao-Ling Sun, and Osamu Sato\*

E-mail: sato@cm.kyushu-u.ac.jp

## Experimental section

**General Procedures.** All reagents and solvents in the syntheses were of reagent grade and used without further purification. (**Caution!**  $Cu(ClO_4)_2 \cdot 6H_2O$  is potentially explosive and should be handled with much care.) Elemental analyses of carbon, hydrogen, and nitrogen were carried out at the Center of Elemental Analysis, College of Science, Kyushu University. Infrared spectroscopy studies were performed on a JASCO FT/IR-600 Plus spectrometer in the  $4000 - 400\text{ cm}^{-1}$  region. UV-Vis spectra were recorded on a Shimadzu UV-3100PC spectrometer with MPC 3100 unit. Powder X-ray diffraction was measured on a Rigaku D/MAX 2000 PC X-Ray Diffraction instrument. ESR spectra were recorded on a JOEL JES-FA200 spectrometer at X-band frequency with 100 kHz field modulation. Supportive CD spectra could not be obtained because of the tiny crystal size of the compound **1**.

**Magnetic measurement.** Magnetic susceptibility measurements were carried out on a Quantum Design MPMS-5S SQUID system. Data were collected at 0.50 Tesla in the temperature range between 2 and 300 K. The experimental susceptibilities were corrected for the diamagnetism of the background of the sample holder and the constituent atoms.

**X-ray crystallography.** X-ray diffraction experiments were carried out on **1** and **2**

using a Rigaku CCD diffractometer with Mo-K $\alpha$  radiation ( $\lambda = 0.71073 \text{ \AA}$ ) at 123 K. Data collection, cell refinement and data reduction: CrystalClear 1.3.5 (Rigaku). The structures were solved by direct methods and refined by the full-matrix method based on  $F^2$  using the SHELXL97 software package (Sheldrick, 1997). All non-hydrogen atoms were refined anisotropically and the positions of all hydrogen atoms were generated geometrically. CCDC-671018 contains the supplementary crystallographic data of **2**, which can be obtained free of charge from *The Cambridge Crystallographic Data Centre* via [www.ccdc.cam.ac.uk/data\\_request/cif](http://www.ccdc.cam.ac.uk/data_request/cif).

**Illumination experiments.** The illumination measurements were carried out by using a transparent tape loaded with a thin layer of the powder sample (less than 1.0 mg) and a UV light source. The light source for the irradiation was a Hayashi LA-310UV instrument with a multi-line spectrum (300 ~ 450 nm). In the photomagnetic experiment, the tape was placed on the edge of an optical fiber. The sample was irradiated continuously at 5 K on a Quantum Design MPMS-5S SQUID system. The diamagnetic contribution and the exact weight were estimated by comparing the magnetic curves before irradiation with those recorded in a routine mode (about 20 mg of sample in gel capsule). The relatively large noise on the experimental data above 200 K came from the use of very small quantities of

the samples.

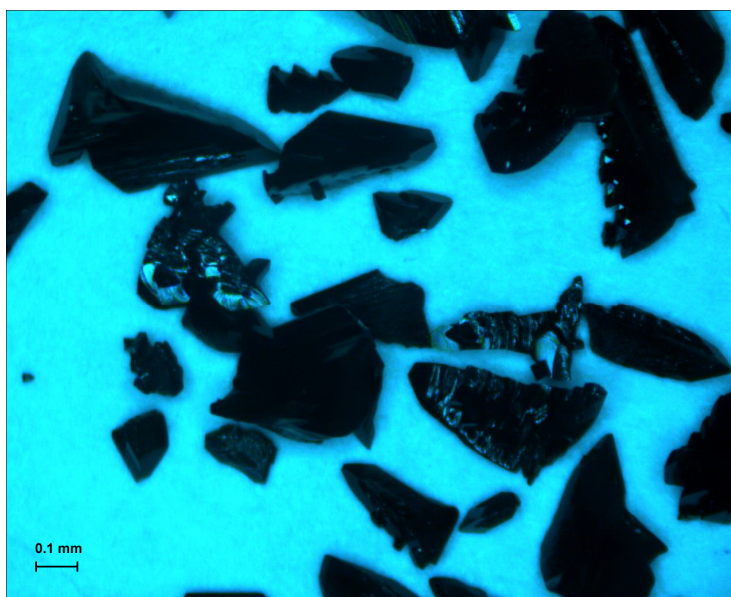

*Figure S1.* Crystal morphology of **1**.

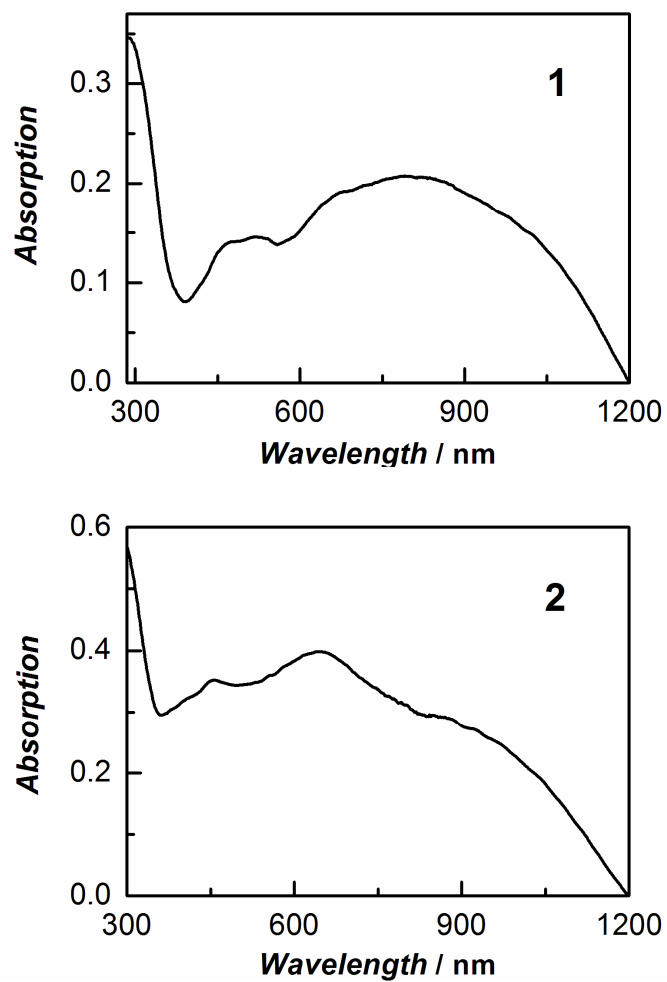

**Figure S2.** Solid-state UV-Vis spectra of **1** and **2**.

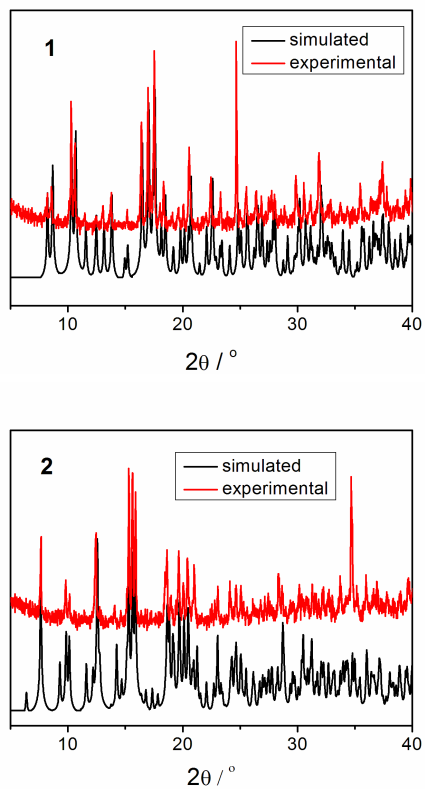

**Figure S3.** The powder X-ray diffraction patterns of bulky crystals of **1** and **2** with the simulated ones from single crystal X-ray diffraction data.

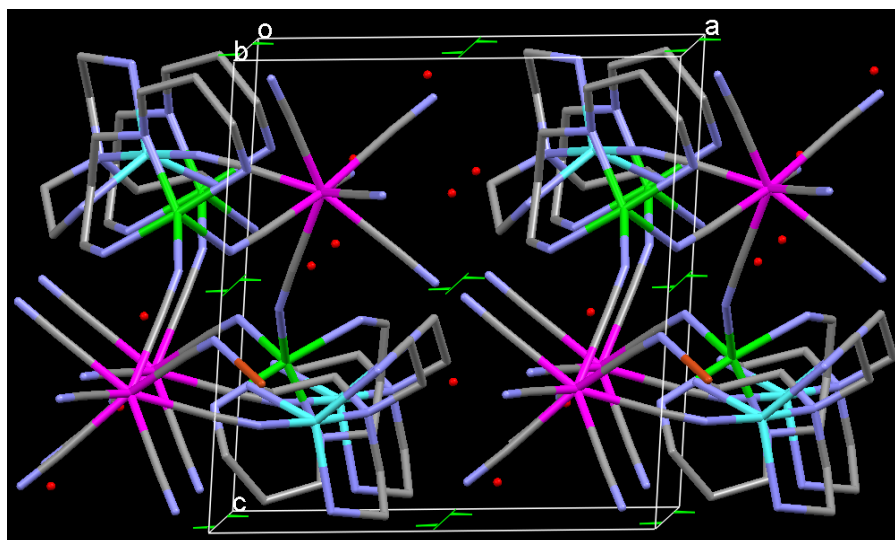

**Figure S4.** Packing diagram of **1** showing the relationship between the helical chain and the symmetric 2<sub>1</sub> screw axis (thin green lines).



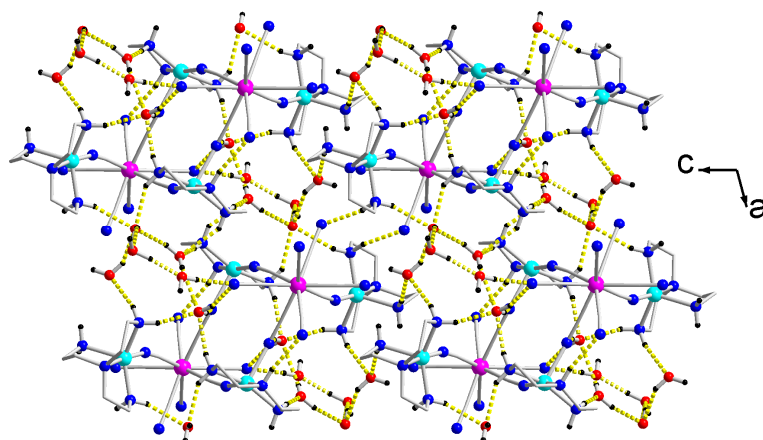

**Figure S5.** Hydrogen bonds in **2** shown as yellow dashed lines. Sphere colors: purple, Mo; cyan, Cu1; green, Cu2; blue, N; gray, C; O, red; black, H.

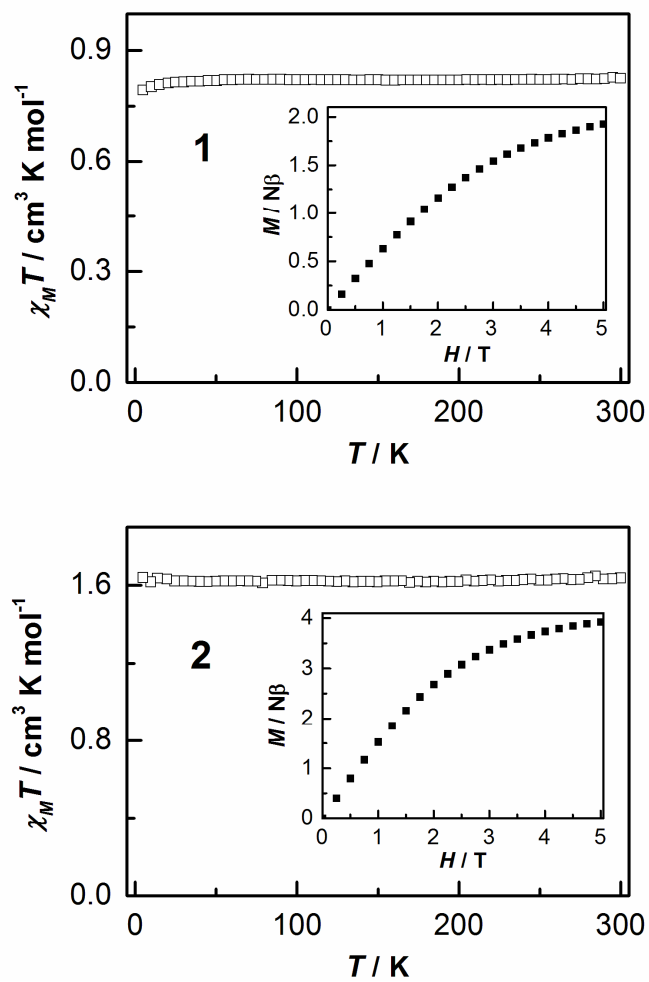

**Figure S6.**  $\chi_M T$  vs  $T$  plots of **1** and **2**. Inset: Plot of magnetization vs  $H$  at 2 K.

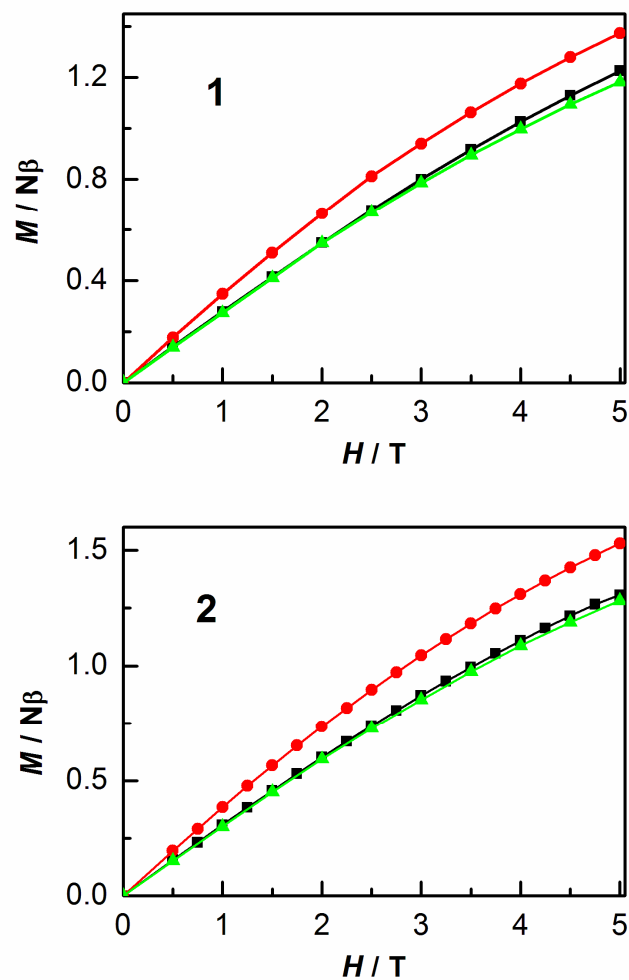

**Figure S7.** Plots of magnetization vs  $H$  of **1** and **2** at 5 K upon light irradiation: (■) before irradiation; (●) after irradiation; (▲) after thermal treatment at 300 K. Lines are guides for the eye.

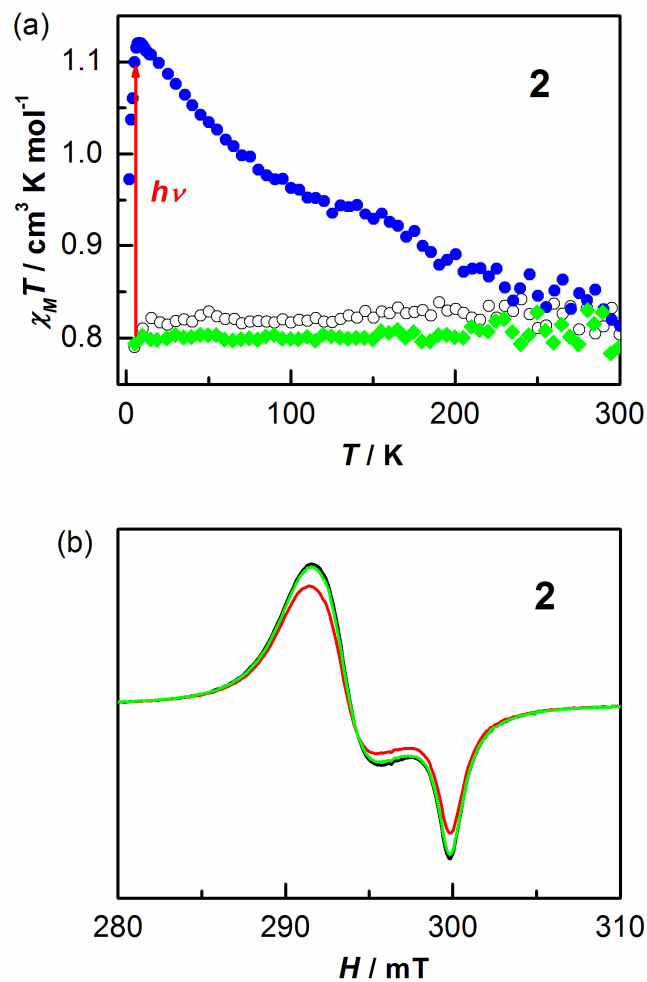

**Figure S8.** (a)  $\chi_M T$  versus  $T$  plot of **2**: (○) before irradiation; (●) after irradiation; (◆) after thermal treatment at 300 K. (b) ESR spectra of **2** at 77 K upon light irradiation: (—) before irradiation; (—) after irradiation; (—) after thermal treatment at 300 K.

**Table S1.** Hydrogen bonds in **1** and **2**.

| D-H      | A [Symmetry code]       | d (D-H) / Å | d (H...A) / Å | <DHA / ° | d (D...A) / Å |
|----------|-------------------------|-------------|---------------|----------|---------------|
| <b>1</b> |                         |             |               |          |               |
| N1-H1A   | O1 [x-1, y, z-1]        | 0.900       | 2.140         | 161.87   | 3.009         |
| N1-H1B   | N14 [-x, y-1/2, -z]     | 0.900       | 2.407         | 150.92   | 3.224         |
| N2-H2A   | O4 [x-1, y, z]          | 0.900       | 2.195         | 157.97   | 3.048         |
| N3-H3A   | N10                     | 0.900       | 2.437         | 148.04   | 3.236         |
| N3-H3B   | N11 [-x, y-1/2, -z+1]   | 0.900       | 2.343         | 148.02   | 3.143         |
| N6-H6A   | N10                     | 0.900       | 2.484         | 172.41   | 3.379         |
| N6-H6B   | O3 [-x+1, y-1/2, -z+1]  | 0.900       | 2.243         | 170.04   | 3.133         |
| N7-H7    | N14 [-x, y-1/2, -z+1]   | 0.910       | 2.560         | 164.16   | 3.444         |
| N8-H8A   | O4 [x-1, y, z]          | 0.900       | 2.229         | 163.28   | 3.101         |
| N8-H8B   | N14 [-x, y-1/2, -z+1]   | 0.900       | 2.619         | 153.62   | 3.448         |
| O1-H1E   | N13 [x, y, z+1]         | 0.884       | 2.007         | 171.94   | 2.886         |
| O1-H1F   | O3 [-x+1, y-1/2, -z+1]  | 0.856       | 1.928         | 169.99   | 2.774         |
| O2-H2E   | N10                     | 0.933       | 2.020         | 165.09   | 2.931         |
| O2-H2F   | O1 [-x+1, y-1/2, -z+1]  | 0.968       | 1.942         | 177.36   | 2.909         |
| O3-H3E   | N12 [-x+1, y+1/2, -z+1] | 0.895       | 1.943         | 168.35   | 2.826         |
| O3-H3F   | N15                     | 0.878       | 1.977         | 159.70   | 2.818         |
| O4-H4F   | O2 [-x+1, y+1/2, -z+1]  | 0.920       | 1.889         | 161.38   | 2.776         |
| O4-H4E   | N9 [x+1, y, z]          | 0.874       | 2.360         | 147.44   | 3.132         |
| <b>2</b> |                         |             |               |          |               |
| N1-H1B   | O1 [-x+1, -y+1, -z+1]   | 0.900       | 2.366         | 145.64   | 3.150         |
| N2-H2A   | O2 [-x+1, -y+1, -z]     | 0.900       | 2.225         | 163.19   | 3.097         |
| N2-H2B   | N14 [-x+1, -y+1, -z]    | 0.900       | 2.655         | 140.82   | 3.401         |
| N3-H3A   | O5 [-x, -y+1, -z+1]     | 0.900       | 2.313         | 140.37   | 3.060         |
| N3-H3B   | N15 [-x, -y+1, -z]      | 0.900       | 2.265         | 164.50   | 3.141         |
| N6-H6A   | O6 [-x+2, -y+1, -z+1]   | 0.900       | 2.334         | 145.96   | 3.121         |
| N6-H6B   | O6                      | 0.900       | 2.029         | 170.78   | 2.921         |
| N7-H7    | N10                     | 0.910       | 2.419         | 163.09   | 3.301         |
| N8-H8A   | O1                      | 0.900       | 2.128         | 164.45   | 3.004         |
| N8-H8B   | O5 [x+1, y, z]          | 0.900       | 2.220         | 147.10   | 3.016         |
| O1-H1E   | N11                     | 0.793       | 2.176         | 153.06   | 2.905         |
| O1-H1F   | N12 [-x+1, -y+1, -z+1]  | 0.826       | 2.242         | 158.56   | 3.027         |
| O2-H2E   | N14 [-x+1, -y+1, -z]    | 0.85        | 2.61          | 96.8     | 2.839         |
| O2-H2E   | N15 [x+1, y, z]         | 0.85        | 2.54          | 100.3    | 2.815         |
| O2-H2F   | O5 [-x+1, -y+1, -z+1]   | 0.850       | 2.317         | 136.59   | 2.992         |
| O3-H3E   | O4                      | 0.946       | 1.755         | 173.79   | 2.698         |
| O3-H3F   | N13 [x+1, y-1, z]       | 0.888       | 1.951         | 167.45   | 2.824         |
| O4-H4F   | N10 [x, y-1, z]         | 0.893       | 1.910         | 174.41   | 2.800         |
| O4-H4E   | N11 [-x+1, -y+1, -z+1]  | 0.861       | 1.982         | 169.04   | 2.833         |
| O5-H5C   | O3 [-x+1, -y+1, -z+1]   | 0.911       | 1.943         | 138.26   | 2.692         |
| O5-H5F   | O3 [-x+1, -y+1, -z+1]   | 0.850       | 1.973         | 141.69   | 2.692         |
| O6-H6F   | O1 [-x+1, -y+1, -z+1]   | 0.850       | 2.307         | 120.33   | 2.833         |
| O6-H6E   | O5 [-x+1, -y+1, -z+1]   | 0.850       | 2.016         | 156.44   | 2.816         |
